# Supplementary material
Source: publisher figshare collection journal article supplement (https://tandf.figshare.com/ndownloader/files/14199137)
Supplement: Supplementary file 1 [file 14199137]

**Epidemiology and exposure studies specific to pyrethroid insecticides: a quality based review**

Carol J. Burns1 and Timothy P. Pastoor2


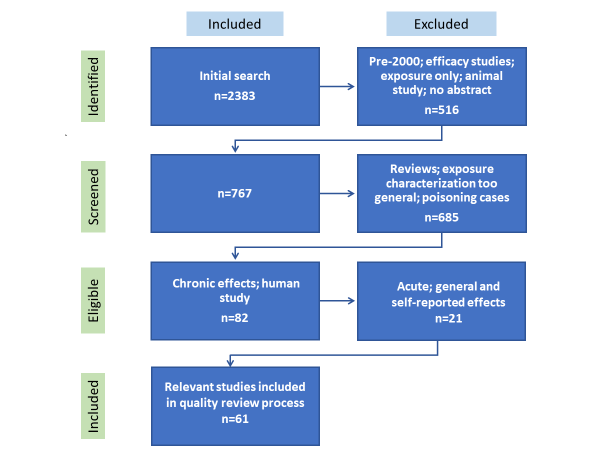


Literature Search

An initial PubMed literature search was conducted on February 15, 2016 using the following key words ((pyrethroid OR pyrethrin) AND (toxicology OR epidemiology)), resulting in 1,173 citations. Another search using PubMed was conducted on October 21, 2016 and identified 2383 publications. Other filters included English language and excluding article type: Meta-Analysis; Review; Systematic Reviews.

A Boolean keyword search included the following string: ((((((((((((((((((((((((((pyrethrin) OR pyrethroid*) OR allethrin stereoisomers) OR bifenthrin) OR beta-cyfluthrin) OR cyfluthrin) OR cyphenothrin) OR deltamethrin) OR esfenvalerate) OR etofenprox) OR fenpropathrin) OR tau-fluvalinate) OR lambda cyhalothrin) OR gamma cyhalothrin) OR imiprothrin) OR 1RS cis-permethrin) OR permethrin) OR prallethrin) OR resmethrin) OR sumithrin) OR d-phenothrin) OR tefluthrin) OR tralomethrin) OR zeta-cypermethrin) OR cypermethrin) OR tetramethrin)

The Boolean second term or strings included: Pregnancy; Autism; Hormone*; Sperm*; Respirat*; ((child*) AND health); ((immune system) OR immune*); Epidemiology

The comprehensive search identified 2,383 publications from which publications that were older than 2000 were removed because these older studies were not epidemiology studies specific to pyrethroids. Most addressed effectiveness, exposure assessment or were animal studies. Also removed were publications that did not include an abstract since their topical area could not be evaluated. This resulted in 767 publications, which were sorted into groups by type of study. We evaluated all studies from both searches based on the title and abstract and selected studies for relevance. The bibliographies of review publications were also searched for additional studies.

Supplement Table 1. Papers that were not reviewed

| **Number** | **Author, year of publication** | **Outcome examined** | **Comment** |
| --- | --- | --- | --- |
|  | (Amer et al. 2002) | Skin tests, and miscellaneous outcomes |  |
|  | (Appel et al. 2008) | Skin irritation in military | Permethrin impregnated battle dress |
|  | (Azmi et al. 2006) | Self-reported symptoms, chronic | Not much more than a case series for farm workers in Pakistan |
|  | (Chen et al. 1991) | Self-reported symptoms, acute | Pyrethroid spray men interviewed after application, China |
|  | (Franzosa et al. 2007) | Type 1 skin hypersensitivity, acute | Review |
|  | (Furlong et al. 2015) | Parkinson’s disease in applicators | Analysis of the AHS, following Kamel, et al., |
|  | (Hansen et al. 2014) | Levels of hbA (glucose regulation/pre-diabetes) | Pesticide applicators |
|  | (He et al. 1988) | Self-reported symptoms, acute | Chinese packaging workers |
|  | (Hudson et al. 2014) | Self-reported symptom, acute | Case series from poison reporting SENSOR |
|  | (Kamel et al. 2007) | Parkinson’s disease in applicators | Analysis of the AHS |
|  | (Kesavachandran et al. 2009) | Nerve conduction velocity | shopkeepers |
|  | (Kilburn 2004) | Neurobehavioral function, pulmonary function, mood | airline flight attendants |
|  | (Kim et al. 2015) | Adult Cognition (dementia) | NHANES |
|  | (Kimura et al. 2005) | Nervous system tests | Tobacco farmers |
|  | (Lafiura et al. 2007) | Incidence of t(8;21) | Cypermethrin in meconium samples |
|  | (Motsoeneng and Dalvie 2015) | Neurotoxic symptoms | Women on farms in South Africa |
|  | (Ofordile et al. 2005) | Mortality due to infectious diseases | This is a quasi study/editorial |
|  | (Sutton et al. 2007) | Acute symptoms in flight attendants | From the SENSOR program in California |
|  | (Wang et al. 2011) | Glucose regulation/pre-diabetes | Occupational exposure |
|  | (Zhang et al. 2013) | Serum levels of thyroid hormones, fT4, TSH, TBG, in adult women | No statistically significant associations were observed for 3-PBA and the 3 hormones. |
|  | (Zhang et al. 2014) | Neonatal hormones T4, FSH in infants (3-4 months) | No significant associations were reported for the neonatal hormones fT4 and TSH and 3-PBA levels. |

References

Amer M, Metwalli M, Abu el-Magd Y. 2002. Skin diseases and enzymatic antioxidant activity among workers exposed to pesticides. East Mediterr Health J. 8(2-3):363-373. Available from <http://www.ncbi.nlm.nih.gov/pubmed/15339126>

Appel KE, Gundert-Remy U, Fischer H, Faulde M, Mross KG, Letzel S, Rossbach B. 2008. Risk assessment of Bundeswehr (German Federal Armed Forces) permethrin-impregnated battle dress uniforms (BDU). Int J Hyg Environ Health. 211(1-2):88-104. Available from <https://www.ncbi.nlm.nih.gov/pubmed/18222725> doi 10.1016/j.ijheh.2007.10.005

Azmi MA, Naqvi SN, Aslam M. 2006. Effect of pesticide residues on health and different enzyme levels in the blood of farm workers from Gadap (rural area) Karachi-Pakistan. Chemosphere. 64(10):1739-1744. Available doi 10.1016/j.chemosphere.2006.01.016

Chen SY, Zhang ZW, He FS, Yao PP, Wu YQ, Sun JX, Liu LH, Li QG. 1991. An epidemiological study on occupational acute pyrethroid poisoning in cotton farmers. Br J Ind Med. 48(2):77-81. Available

Franzosa JA, Osimitz TG, Maibach HI. 2007. Cutaneous contact urticaria to pyrethrum-real?, common?, or not documented?: an evidence-based approach. Cutan Ocul Toxicol. 26(1):57-72. Available doi 10.1080/15569520601183880

Furlong M, Tanner CM, Goldman SM, Bhudhikanok GS, Blair A, Chade A, Comyns K, Hoppin JA, Kasten M, Korell M, et al. 2015. Protective glove use and hygiene habits modify the associations of specific pesticides with Parkinson's disease. Environ Int. 75:144-150. Available from <http://www.ncbi.nlm.nih.gov/pubmed/25461423> doi 10.1016/j.envint.2014.11.002

Hansen MR, Jors E, Lander F, Condarco G, Schlunssen V. 2014. Is cumulated pyrethroid exposure associated with prediabetes? A cross-sectional study. J Agromedicine. 19(4):417-426. Available doi 10.1080/1059924x.2014.945708

He F, Sun J, Han K, Wu Y, Yao P, Wang S, Liu L. 1988. Effects of pyrethroid insecticides on subjects engaged in packaging pyrethroids. Br J Ind Med. 45(8):548-551. Available

Hudson NL, Kasner EJ, Beckman J, Mehler L, Schwartz A, Higgins S, Bonnar-Prado J, Lackovic M, Mulay P, Mitchell Y, et al. 2014. Characteristics and magnitude of acute pesticide-related illnesses and injuries associated with pyrethrin and pyrethroid exposures--11 states, 2000-2008. Am J Ind Med. 57(1):15-30. Available doi 10.1002/ajim.22216

Kamel F, Tanner C, Umbach D, Hoppin J, Alavanja M, Blair A, Comyns K, Goldman S, Korell M, Langston J, et al. 2007. Pesticide exposure and self-reported Parkinson's disease in the agricultural health study. Am J Epidemiol. 165(4):364-374. Available from <http://www.ncbi.nlm.nih.gov/pubmed/17116648> doi 10.1093/aje/kwk024

Kesavachandran C, Pathak MK, Fareed M, Bihari V, Mathur N, Srivastava AK. 2009. Health risks of employees working in pesticide retail shops: An exploratory study. Indian J Occup Environ Med. 13(3):121-126. Available doi 10.4103/0019-5278.58914

Kilburn KH. 2004. Effects of onboard insecticide use on airline flight attendants. Arch Environ Health. 59(6):284-291. Available

Kim KS, Lee YM, Lee HW, Jacobs DR, Jr., Lee DH. 2015. Associations between organochlorine pesticides and cognition in U.S. elders: National Health and Nutrition Examination Survey 1999-2002. Environ Int. 75:87-92. Available doi 10.1016/j.envint.2014.11.003

Kimura K, Yokoyama K, Sato H, Nordin RB, Naing L, Kimura S, Okabe S, Maeno T, Kobayashi Y, Kitamura F, et al. 2005. Effects of pesticides on the peripheral and central nervous system in tobacco farmers in Malaysia: studies on peripheral nerve conduction, brain-evoked potentials and computerized posturography. Ind Health. 43(2):285-294. Available

Lafiura KM, Bielawski DM, Posecion NC, Jr., Ostrea EM, Jr., Matherly LH, Taub JW, Ge Y. 2007. Association between prenatal pesticide exposures and the generation of leukemia-associated T(8;21). Pediatr Blood Cancer. 49(5):624-628. Available doi 10.1002/pbc.21283

Motsoeneng PM, Dalvie MA. 2015. Relationship between Urinary Pesticide Residue Levels and Neurotoxic Symptoms among Women on Farms in the Western Cape, South Africa. Int J Environ Res Public Health. 12(6):6281-6299. Available from <http://www.ncbi.nlm.nih.gov/pubmed/26042367> doi 10.3390/ijerph120606281

Ofordile ON, Prentice AM, Moore SE, Holladay SD. 2005. Early pesticide exposure and later mortality in rural Africa: a new hypothesis. J Immunotoxicol. 2(1):33-40. Available doi 10.1080/15476910590949452

Sutton PM, Vergara X, Beckman J, Nicas M, Das R. 2007. Pesticide illness among flight attendants due to aircraft disinsection. Am J Ind Med. 50(5):345-356. Available from <http://www.ncbi.nlm.nih.gov/pubmed/17407145> doi 10.1002/ajim.20452

Wang J, Zhu Y, Cai X, Yu J, Yang X, Cheng J. 2011. Abnormal glucose regulation in pyrethroid pesticide factory workers. Chemosphere. 82(7):1080-1082. Available doi 10.1016/j.chemosphere.2010.10.065

Zhang J, Hisada A, Yoshinaga J, Shiraishi H, Shimodaira K, Okai T, Noda Y, Shirakawa M, Kato N. 2013. Exposure to pyrethroids insecticides and serum levels of thyroid-related measures in pregnant women. Environ Res. 127:16-21. Available from <http://www.ncbi.nlm.nih.gov/pubmed/24210131> doi 10.1016/j.envres.2013.10.001

Zhang J, Yoshinaga J, Hisada A, Shiraishi H, Shimodaira K, Okai T, Koyama M, Watanabe N, Suzuki E, Shirakawa M, et al. 2014. Prenatal pyrethroid insecticide exposure and thyroid hormone levels and birth sizes of neonates. Sci Total Environ. 488-489:275-279. Available from <http://www.ncbi.nlm.nih.gov/pubmed/24836137> doi 10.1016/j.scitotenv.2014.04.104
